# Supplementary material
Source: publisher figshare collection journal article supplement (https://sage.figshare.com/ndownloader/files/22659089)
Supplement: Supplementary file 1 [file 22659089]

*Supplementary Table 1*

*Means and effect sizes with 95% Confidence Intervals for subscales of the Dimensional Anhedonia Rating Scale and Positive and Negative Affect Schedule over the course of the study.*

|                     | Baseline<br>(T1)        | Post-training<br>(T2)   | Follow-up<br>(T3) | Within-group d<br>[95% CIs] |          | Between-group d<br>[95% CIs] |          |
|---------------------|-------------------------|-------------------------|-------------------|-----------------------------|----------|------------------------------|----------|
|                     | M<br>[95% CIs]          | M<br>[95% CIs]          | M<br>[95% CIs]    | T1 to T2                    | T1 to T3 | T1 to T2                     | T1 to T3 |
| <b>DARS Hobbies</b> |                         |                         |                   |                             |          |                              |          |
| ITT                 |                         |                         |                   |                             |          |                              |          |
| CBM                 | 21.17<br>[19.86, 22.49] | 25.99<br>[24.67, 27.31] |                   | 1.32<br>[1.17, 2.16]        |          | 1.25<br>[1.11, 2.58]         |          |
| Control             | 19.92<br>[18.53, 21.32] | 20.23<br>[18.75, 21.72] |                   | 0.08<br>[-0.22, 0.38]       |          |                              |          |
| CC                  |                         |                         |                   |                             |          |                              |          |
| CBM                 | 21.17<br>[19.96, 22.39] | 25.75<br>[24.68, 26.82] |                   | 1.35<br>[1.15, 2.25]        |          | 1.27<br>[1.15, 2.65]         |          |
| Control             | 19.92<br>[18.36, 21.49] | 20.12<br>[18.24, 22.00] |                   | 0.10<br>[-0.29, 0.48]       |          |                              |          |
| <b>DARS Food</b>    |                         |                         |                   |                             |          |                              |          |
| ITT                 |                         |                         |                   |                             |          |                              |          |
| CBM                 | 13.24<br>[12.26, 14.22] | 16.96<br>[15.92, 18.01] |                   | 1.37<br>[1.09, 2.06]        |          | 0.90<br>[0.55, 1.89]         |          |
| Control             | 12.46<br>[11.42, 13.50] | 13.76<br>[12.58, 14.93] |                   | 0.47<br>[0.11, 0.76]        |          |                              |          |
| CC                  |                         |                         |                   |                             |          |                              |          |
| CBM                 | 13.24<br>[12.31, 14.17] | 17.00<br>[16.04, 17.96] |                   | 1.36<br>[1.00, 2.13]        |          | 0.99<br>[0.63, 2.01]         |          |
| Control             | 12.46<br>[11.32, 13.61] | 14.35<br>[12.75, 15.96] |                   | 0.38<br>[0.01, 0.69]        |          |                              |          |

|              |                |                |                |               |               |              |              |  |
|--------------|----------------|----------------|----------------|---------------|---------------|--------------|--------------|--|
| DARS Social  |                |                |                |               |               |              |              |  |
| ITT          |                |                |                |               |               |              |              |  |
| CBM          | 12.86          | 17.32          |                | 1.76          |               | 1.26         |              |  |
|              | [11.95, 13.78] | [16.21, 18.43] |                | [1.29, 2.52]  |               | [0.53, 1.87] |              |  |
| Control      | 12.81          | 14.12          |                | 0.51          |               |              |              |  |
|              | [11.84, 13.77] | [12.83, 15.41] |                | [0.02, 0.86]  |               |              |              |  |
| CC           |                |                |                |               |               |              |              |  |
| CBM          | 12.86          | 17.17          |                | 1.81          |               | 1.39         |              |  |
|              | [11.95, 13.77] | [16.20, 18.13] |                | [1.27, 2.64]  |               | [0.62, 1.99] |              |  |
| Control      | 12.81          | 14.35          |                | 0.43          |               |              |              |  |
|              | [11.79, 13.82] | [12.63, 16.08] |                | [-0.14, 0.89] |               |              |              |  |
| DARS Sensory |                |                |                |               |               |              |              |  |
| ITT          |                |                |                |               |               |              |              |  |
| CBM          | 10.72          | 14.67          |                | 1.84          |               | 1.72         |              |  |
|              | [9.95, 11.50]  | [13.59, 15.75] |                | [1.20, 2.50]  |               | [0.66, 2.02] |              |  |
| Control      | 11.00          | 11.30          |                | 0.14          |               |              |              |  |
|              | [10.18, 11.82] | [10.03, 12.57] |                | [-0.36, 0.58] |               |              |              |  |
| CC           |                |                |                |               |               |              |              |  |
| CBM          | 10.72          | 14.62          |                | 1.87          |               | 1.78         |              |  |
|              | [9.98, 11.47]  | [13.66, 15.59] |                | [1.19, 2.56]  |               | [0.68, 2.07] |              |  |
| Control      | 11.00          | 11.35          |                | 0.11          |               |              |              |  |
|              | [10.12, 11.88] | [9.76, 12.95]  |                | [-0.50, 0.67] |               |              |              |  |
| PANAS- J     |                |                |                |               |               |              |              |  |
| ITT          |                |                |                |               |               |              |              |  |
| CBM          | 17.79          | 23.28          | 20.66          | 1.61          | 0.81          |              |              |  |
|              | [16.56, 19.03] | [22.18, 24.38] | [19.30, 22.02] | [1.26, 2.29]  | [0.38, 1.51]  |              |              |  |
| Control      | 17.38          | 17.18          | 15.99          | -0.06         | -0.38         | 1.70         | 1.24         |  |
|              | [16.08, 18.69] | [15.90, 18.47] | [14.39, 17.58] | [-0.54, 0.41] | [-1.18, 0.17] | [0.99, 2.17] | [0.35, 1.43] |  |
| CC           |                |                |                |               |               |              |              |  |
| CBM          | 17.79          | 23.25          | 20.27          | 1.63          | 0.94          |              |              |  |
|              | [16.55, 19.04] | [22.03, 24.47] | [18.42, 22.13] | [1.14, 2.43]  | [0.15, 2.03]  | 1.79         | 1.47         |  |
| Control      | 17.38          | 17.35          | 16.00          | -0.14         | -0.44         | [1.15, 2.65] | [0.29, 2.31] |  |

|          | [16.05, 18.72] | [16.06, 18.65] | [14.27, 17.73] | [-0.71, 0.39] | [-1.44, 0.30] |              |               |
|----------|----------------|----------------|----------------|---------------|---------------|--------------|---------------|
| PANAS-SA |                |                |                |               |               |              |               |
| ITT      |                |                |                |               |               |              |               |
| CBM      | 13.41          | 16.90          | 14.56          | 1.45          | 0.46          |              |               |
|          | [12.54, 14.29] | [16.09, 17.71] | [13.22, 15.91] | [1.24, 2.27]  | [-0.10, 1.06] |              |               |
| Control  | 12.73          | 12.96          | 12.84          | 0.09          | 0.04          | 1.37         | 0.43          |
|          | [11.81, 13.66] | [12.02, 13.89] | [11.27, 14.40] | [-0.30, 0.49] | [-0.57, 0.66] | [0.82, 1.97] | [-0.26, 0.77] |
| CC       |                |                |                |               |               |              |               |
| CBM      | 13.41          | 16.58          | 14.09          | 1.57          | 0.43          |              |               |
|          | [12.58, 14.25] | [15.85, 17.32] | [12.38, 15.80] | [1.28, 2.54]  | [-0.29, 1.18] |              |               |
| Control  | 12.73          | 12.82          | 12.62          | 0.14          | -0.29         | 1.45         | 0.77          |
|          | [11.73, 13.73] | [11.74, 13.90] | [10.39, 14.86] | [-0.33, 0.63] | [-0.85, 0.29] | [1.08, 2.56] | [-0.23, 1.65] |
| PANAS-S  |                |                |                |               |               |              |               |
| ITT      |                |                |                |               |               |              |               |
| CBM      | 6.31           | 8.49           | 7.71           | 1.44          | 0.88          |              |               |
|          | [5.76, 6.86]   | [7.97, 9.02]   | [6.99, 8.42]   | [1.17, 2.42]  | [0.37, 1.70]  |              |               |
| Control  | 6.73           | 6.76           | 6.64           | 0.02          | -0.05         | 1.45         | 0.97          |
|          | [6.15, 7.31]   | [6.13, 7.38]   | [5.80, 7.48]   | [-0.45, 0.48] | [-0.70, 0.58] | [0.59, 1.70] | [0.06, 1.11]  |
| CC       |                |                |                |               |               |              |               |
| CBM      | 6.31           | 8.50           | 7.55           | 1.43          | 0.92          |              |               |
|          | [5.81, 6.81]   | [8.03, 8.97]   | [6.63, 8.46]   | [1.09, 2.46]  | [0.10, 2.03]  |              |               |
| Control  | 6.73           | 6.76           | 6.50           | 0.00          | -0.15         | 1.45         | 1.13          |
|          | [6.08, 7.38]   | [5.98, 7.55]   | [5.32, 7.68]   | [-0.59, 0.59] | [-0.93, 0.61] | [0.64, 2.01] | [-0.04, 1.89] |

*Note.* ITT = Intention to Treat, CC = Complete Case (using all available data, i.e. the mean presented at pre-training is all participants, the mean presented at post-training is from all participants who provided post-training data, and the mean presented at follow-up is from all participants who provided data at follow up. This means effect size estimates may appear not to match the means presented, as the effect size estimates only include participants who provided data at both relevant time-points), PANAS-J/SA/S = Joviality/Self-Assurance/Serenity subscale of the Positive and Negative Affect Schedule, DARS Hobbies/ Food/ Social/ Sensory= Dimensional Anhedonia Rating Scale Hobbies/ Food/ Social/ Sensory subscale.
